# Supplementary material
Source: PubMed Central journal article supplement (PMC4390399)
Supplement: NIHMS626540-supplement-supplement_1.pdf [file NIHMS626540-supplement-supplement_1.pdf]

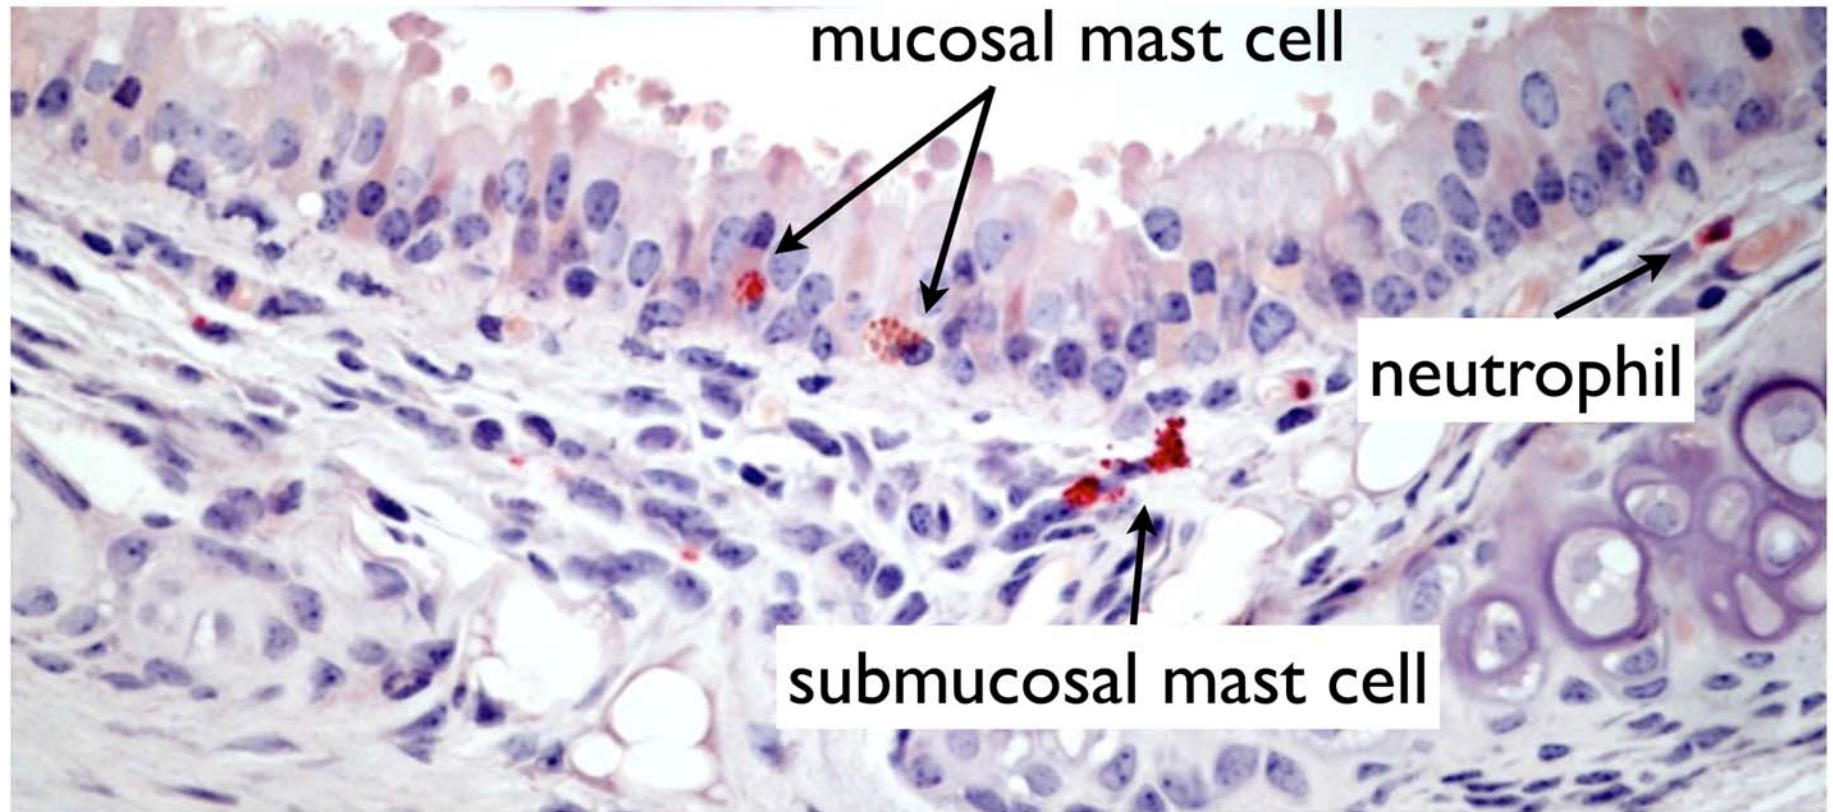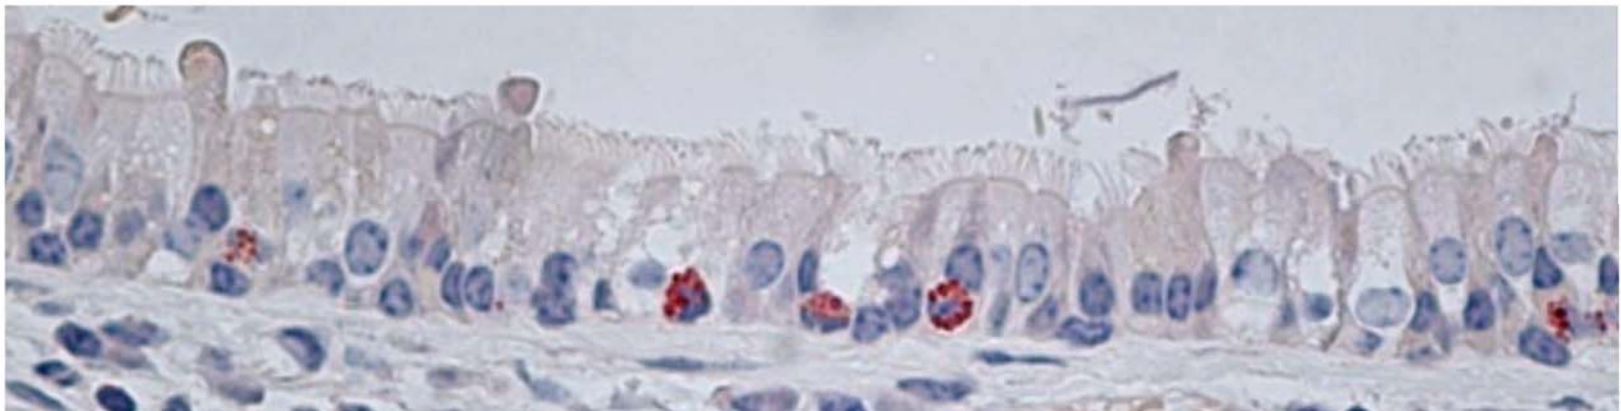

**Supplemental Figure 1** Histology of airways from challenged mice showing interepithelial MMCs and submucosal CMCs in the trachea. MCs are identified by their reactivity for chloroacetate esterase with a hematoxylin counterstain. A neutrophil is shown for comparison.

# Sensitization Challenge

# Post challenge

Day -14 -7

1-7

D1 D7 D14 D21 D42 D77

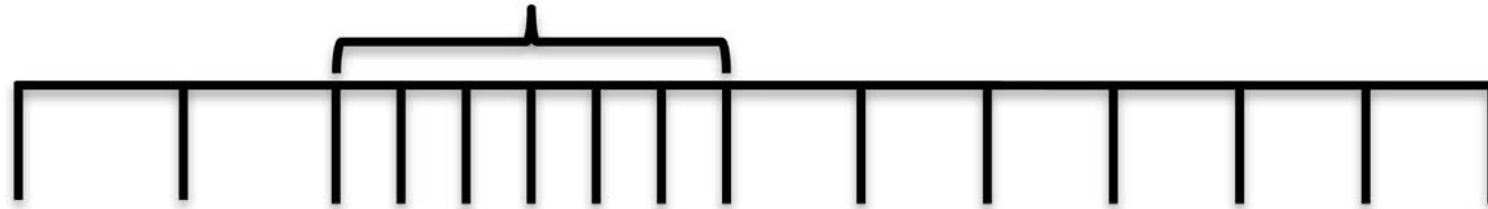

**Sensitization:**  
ovalbumin  
and alum ip

**2%**  
aerosolized  
ovalbumin  
challenges

**Analysis for**  
- MC populations (FACS D1-D14)  
- mucosal MCs and CMC  
(histology D1-77)

**Supplemental Figure 2** Protocol of OVA-induced airway inflammation and analysis. BALB/c mice were sensitized with OVA/alum injected intraperitoneally on days -14 and -7 and either not challenged or challenged with 2% aerosolized OVA daily on days 1-7. Mice were analyzed on D1, D7, D14, D21, D42 and D77 post-challenge.
